# Supplementary material for: Electrospun flexible self-standing Cu–Al2O3 fibrous membranes as Fenton catalysts for bisphenol A degradation
Source: Royal Society of Chemistry journal article supplement (doi:10.1039/c7ta04386d), 2017-01-01
Supplement: c7ta04386d1.pdf [file c7ta04386d1.pdf]

1 Electronic Supplementary Information for

2 **Electrospun flexible self-standing Cu-Al<sub>2</sub>O<sub>3</sub> fibrous membranes as**  
3 **Fenton catalysts for bisphenol A degradation**

4 Yan Wang<sup>a</sup>, Jiang Li<sup>a, b</sup>, Jianyang Sun<sup>a</sup>, Yanbin Wang<sup>a</sup>, Xu Zhao<sup>\*a, c</sup>

5 a, Key Laboratory of Drinking Water Science and Technology, Research Center for Eco-  
6 Environmental Sciences, Chinese Academy of Sciences, Beijing 100085, P.R. China.

7 b, School of Light Industry and Chemical Engineering, Dalian Polytechnic University, Dalian  
8 116034, P. R. China

9 c, University of Chinese Academy of Sciences, Beijing, P.R. China.

10

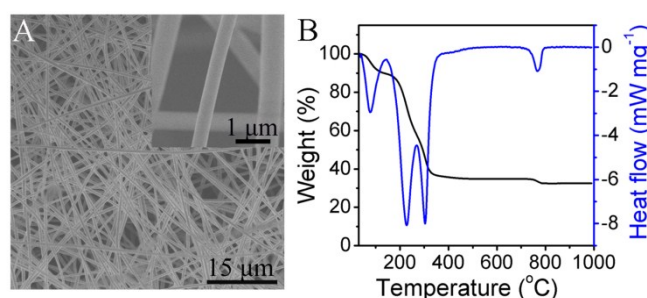

11

12 **Fig. S1** (A) SEM image and (B) TG-DSC curves of the 5 wt% Cu-Al<sub>2</sub>O<sub>3</sub> xerogel fibrous membranes

13

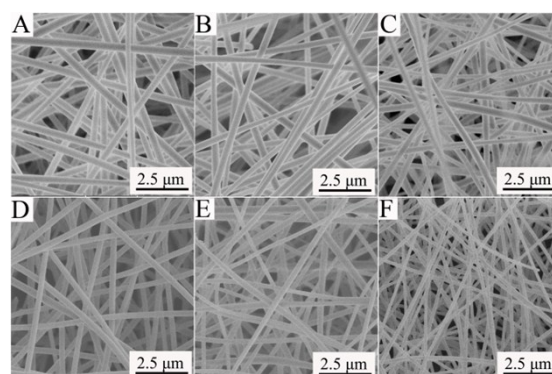

14

15 **Fig. S2** SEM images of Cu-Al<sub>2</sub>O<sub>3</sub> membranes. (A-D) Cu-Al<sub>2</sub>O<sub>3</sub>-600 membranes with various Cu  
16 content (A) 1 wt%, (B) 3 wt%, (C) 5 wt%, (D) 7 wt%; (E-F) 5 wt% Cu-Al<sub>2</sub>O<sub>3</sub> membranes calcined  
17 at various temperatures (E) 700 °C, (F) 800 °C.

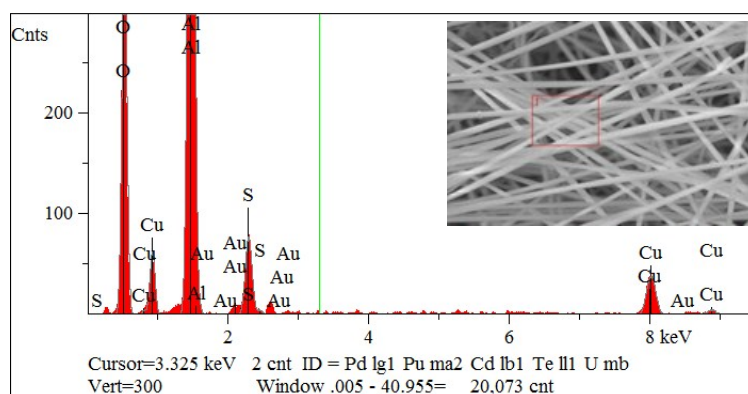

**Fig. S3** EDS of 5 wt% Cu-Al<sub>2</sub>O<sub>3</sub>-600 membranes.

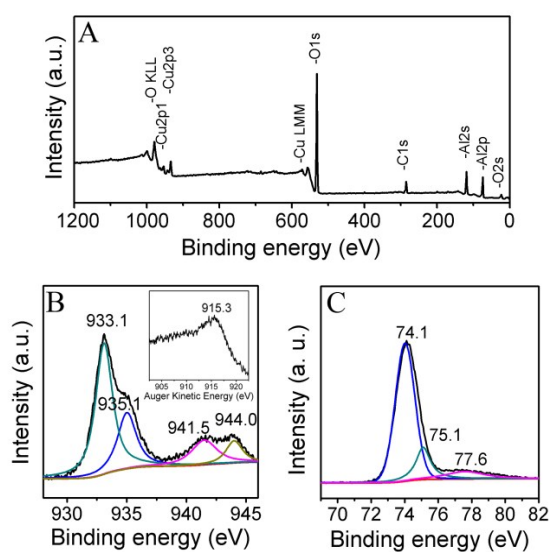

**Fig. S4** XPS analysis of the 5 wt% Cu-Al<sub>2</sub>O<sub>3</sub>-800 membrane, (A) XPS survey (B) Cu 2p and (C) Al 2p spectra.

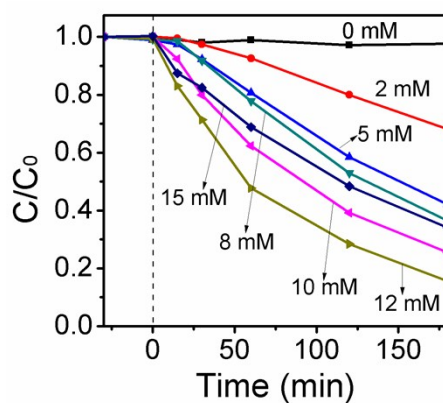

**Fig. S5** The influence of H<sub>2</sub>O<sub>2</sub> dosage on the BPA degradation by the 5 wt% Cu-Al<sub>2</sub>O<sub>3</sub>-600 membrane. Conditions: [BPA] = 20 mg/L, initial pH 7.

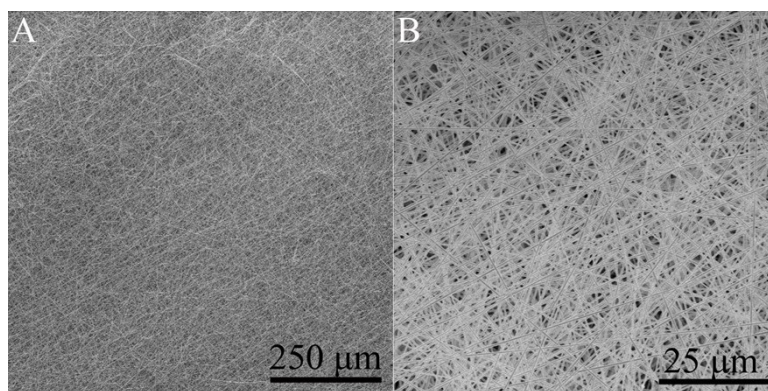

**Fig. S6** (A) low magnification and (B) high magnification SEM images of the membrane after the continuous degradation reactions.

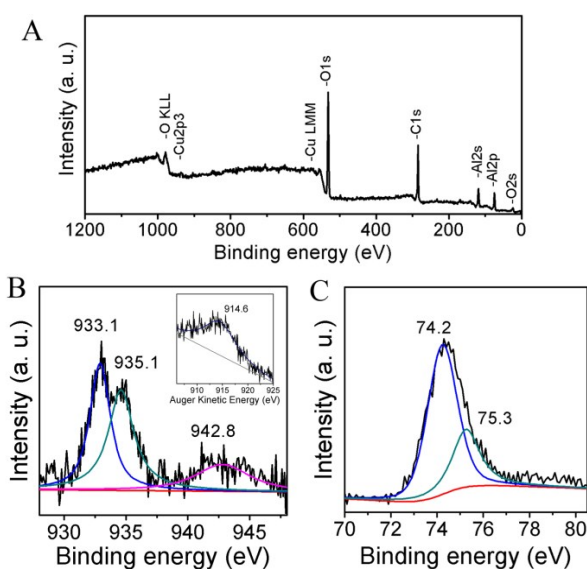

**Fig. S7** XPS analysis of the 5% Cu-Al<sub>2</sub>O<sub>3</sub>-600 membrane after use, (A) XPS survey (B) Cu 2p and (C) Al 2p spectra.

**Table. S1** Average fiber diameter of various Cu-Al<sub>2</sub>O<sub>3</sub> samples

| Sample        | Average fiber diameter<br>(nm) | Sample        | Average fiber diameter<br>(nm) |
|---------------|--------------------------------|---------------|--------------------------------|
| 1 wt% -600 °C | 390                            | 7 wt% -600 °C | 320                            |
| 3 wt% -600 °C | 360                            | 5 wt% -700 °C | 270                            |
| 5 wt% -600 °C | 340                            | 5 wt% -800 °C | 190                            |

**Table. S2** Elemental composition of 5 wt% Cu–Al<sub>2</sub>O<sub>3</sub>-600 membranes.

| Elements | Intensity (c/s) | Atomic (%) | Concentration ( wt.%) |
|----------|-----------------|------------|-----------------------|
| O        | 173.45          | 57.856     | 42.88                 |
| Al       | 600.93          | 37.173     | 46.47                 |
| Cu       | 32.47           | 2.237      | 6.59                  |
| S        | 46.81           | 2.735      | 4.06                  |
| Total    |                 | 100.00     | 100.00                |

**Table S3** The BET surface areas and porosity of the samples

| Samples                                      | BET surface area<br>(m <sup>2</sup> g <sup>-1</sup> ) | Pore width<br>(nm) | Pore volume<br>(cc g <sup>-1</sup> ) |
|----------------------------------------------|-------------------------------------------------------|--------------------|--------------------------------------|
| 1 wt% Cu-Al <sub>2</sub> O <sub>3</sub> -600 | 12.33                                                 | 5.75               | 0.01930                              |
| 3 wt% Cu-Al <sub>2</sub> O <sub>3</sub> -600 | 9.26                                                  | 6.22               | 0.01175                              |
| 5 wt% Cu-Al <sub>2</sub> O <sub>3</sub> -600 | 10.10                                                 | 5.92               | 0.01588                              |
| 7 wt% Cu-Al <sub>2</sub> O <sub>3</sub> -600 | 8.11                                                  | 5.19               | 0.01278                              |
| 5 wt% Cu-Al <sub>2</sub> O <sub>3</sub> -700 | 40.56                                                 | 5.44               | 0.07532                              |
| 5 wt% Cu-Al <sub>2</sub> O <sub>3</sub> -800 | 38.63                                                 | 5.51               | 0.07347                              |

**Table S4** Results of Fenton-like degradation of BPA based on various Cu-based catalysts

| Catalyst                                         | morphology  | BPA initial<br>conc. (ppm) | H <sub>2</sub> O <sub>2</sub> initial concentration<br>(mM) | Removal ability      | Ref.         |
|--------------------------------------------------|-------------|----------------------------|-------------------------------------------------------------|----------------------|--------------|
| copper–aluminum–<br>silica                       | nanospheres | 23                         | 10                                                          | 98.3% within 60 min  | [1]          |
| Mesoporous γ-Cu-Al <sub>2</sub> O <sub>3</sub>   | powders     | 23                         | 10                                                          | 100% within 180 min  | [2]          |
| Mesoporous Cu/TUD-1                              | powders     | 100                        | 90                                                          | 90.4% within 180 min | [3]          |
| 1 wt% Cu- Al <sub>2</sub> O <sub>3</sub> -600 °C | membranes   | 20                         | 12                                                          | 87% within 180 min   | This<br>work |
| 5 wt% Cu- Al <sub>2</sub> O <sub>3</sub> -800 °C | membranes   | 20                         | 12                                                          | 85% within 60 min    | This<br>work |

**Reaction conditions:** catalyst concentration 1.0 g L<sup>-1</sup>, Initial pH 7 (except for Mesoporous Cu/TUD-1, Initial pH 3.5).

**Table S5** Identification of the intermediates by UPLC-Q-TOF-MS.

| Products   | Structure                                                                           | m/z |
|------------|-------------------------------------------------------------------------------------|-----|
| <b>BPA</b> | 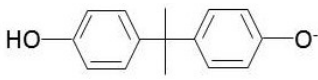   | 227 |
| <b>P1</b>  |    | 242 |
| <b>P2</b>  |    | 247 |
| <b>P3</b>  |    | 135 |
| <b>P4</b>  |   | 133 |
| <b>P5</b>  |  | 94  |
| <b>P6</b>  | $\text{HOOC-CH}_2\text{-CH}_2\text{-COO}^-$                                         | 117 |
| <b>P7</b>  | $\text{HOOC-CH=CH-COO}^-$                                                           | 115 |
| <b>P8</b>  | $\text{H-C(=O)-CH=CH-COO}^-$                                                        | 99  |
| <b>P9</b>  | $\text{OOC-CH(OH)-CH}_3$                                                            | 89  |

The XPS spectra of the 5 wt% Cu-Al<sub>2</sub>O<sub>3</sub> membrane calcined at 800 °C was shown in Fig. S4. In the XPS survey spectrum, the peaks of Al, O, Cu, and C elements are observed, while the peaks of S element are absence. The results indicate that SO<sub>4</sub><sup>2-</sup> is totally removed when the membrane calcined at 800 °C. In the Cu 2p and Al 2p XPS spectra, both of Cu<sup>+</sup> (933.1 eV), Cu<sup>2+</sup> (935.1 eV) and Al-O-Al (74.1 eV), Al-O-Cu (75.1 eV) are observed. The shakeup satellite line at 941.5 and 944.0 eV in Cu 2p<sub>3/2</sub> spectra correspond to Cu<sup>2+</sup>.<sup>4</sup> The auger kinetic energy at 915.3 eV in AES spectra confirmed the

1 existence of  $\text{Cu}^+$ , and 77.6 eV in Al 2p spectra was assigned to  $\text{Al}^{3+}$ .<sup>5</sup>

2  
3 The details of the methods for preparing Cu- $\text{Al}_2\text{O}_3$  catalysts are discussed as follows: In the  
4 literature, the Cu- $\text{Al}_2\text{O}_3$  catalyst is usually prepared by a two-step procedure.<sup>6,7</sup> Specifically, the first  
5 step is the preparation of  $\text{Al}_2\text{O}_3$  powder through evaporation-induced self-assembly method, which is  
6 used as the catalyst support; in the second step, the Cu- $\text{Al}_2\text{O}_3$  powder catalyst is prepared by  
7 immersing  $\text{Al}_2\text{O}_3$  powder in to the copper precursor such as  $\text{Cu}(\text{NO}_3)_2 \cdot 3\text{H}_2\text{O}$ , which is called  
8 impregnation method, and it is usually followed by a calcination procedure. The two-step preparation  
9 method usually resulted in the powder form catalyst, and the Cu catalyst is easy to drop off from the  
10  $\text{Al}_2\text{O}_3$  support.

11 In some research, the Cu- $\text{Al}_2\text{O}_3$  catalyst is prepared by a one-step procedure via the  
12 evaporation-induced self-assembly method followed by a calcination procedure.<sup>2</sup> This method could  
13 obtain the Cu- $\text{Al}_2\text{O}_3$  catalyst with Al-O-Cu bond, which could decrease the Cu leaching during use.  
14 However, the Cu- $\text{Al}_2\text{O}_3$  catalyst obtained by this method is still in powder form, and evaporation-  
15 induced self-assembly method usually need a long time to evaporate the solvents.

16 In this paper, the Cu- $\text{Al}_2\text{O}_3$  catalyst is prepared by a one-step procedure via electrospinning  
17 method. The copper is dissolved in the alumina precursor, and the Cu- $\text{Al}_2\text{O}_3$  membrane catalyst  
18 could be directly obtained via the electrospinning process followed by a calcination procedure.  
19 During the electrospinning process, the solvent evaporate rapidly, leading to the immediately  
20 formation of Cu- $\text{Al}_2\text{O}_3$  nanofibers with uniformly distributed Al-O-Cu bond in the fibers. The high  
21 aspect ratio of the nanofibers is good for the formation of flexible Cu- $\text{Al}_2\text{O}_3$  membranes.

22  
23  
24 Because the  $\text{H}_2\text{O}_2$  dosage is a key factor that influence the Fenton reaction,<sup>2</sup> the reaction was  
25 optimized by varying the  $\text{H}_2\text{O}_2$  dosage. As shown in Fig. S5, the removal percentages of BPA within  
26 3 h were 3%, 32%, 58%, 64%, 75%, 84% and 67% when the  $\text{H}_2\text{O}_2$  dosages were 0, 2, 5, 8, 10, 12  
27 and 15 mM, respectively. The degradation rate increased when the  $\text{H}_2\text{O}_2$  dosages increased from 0-  
28 12 mM, because  $\cdot\text{OH}$  is generated by the  $\text{H}_2\text{O}_2$  precursor. However, the degradation rate decreased  
29 when the  $\text{H}_2\text{O}_2$  dosages increased from 12 mM to 15 mM, and this is supposed to be caused by the  
30 scavenging effect of  $\cdot\text{OH}$  by excess  $\text{H}_2\text{O}_2$ .<sup>2</sup> Therefore, 12 mM was the optimal  $\text{H}_2\text{O}_2$  dosage in this  
31 reaction.

The leaching percentages of Cu and Al in the membranes are calculated. The computation process is as follows: for the 1 wt% Cu-Al<sub>2</sub>O<sub>3</sub>, the amount of Cu in 10 mg membrane is 0.1 mg; After reaction, Cu leaching is 0.151 mg L<sup>-1</sup>, the reaction solution is 10 mL, thus the amount of Cu leaching is 0.151 mg/L\*0.01 L=0.00151 mg; the percentage of Cu leaching is 0.00151/0.1=1.51% for the 1 wt% Cu-Al<sub>2</sub>O<sub>3</sub> membrane. Hence, for 1, 3, 5, 7 wt% Cu-Al<sub>2</sub>O<sub>3</sub> membranes, the Cu leaching percentages are respectively 1.51%, 0.43%, 0.64%, 0.61%, and the Al leaching percentages are all remained 0.02%.

Fig. S7 presents the XPS results of the Cu-Al<sub>2</sub>O<sub>3</sub>-600 membrane after use. It can be seen that the peaks of the main elements of the membranes including Al, O, and Cu are observed in the XPS survey spectrum. From the Cu 2p and Al 2p spectra, it can be seen that the peaks of the Cu<sup>+</sup> (933.1 and 914.6 eV), Cu<sup>2+</sup> (935.1 and 942.8 eV), Al-O-Al (74.2 eV) and Al-O-Cu (75.3 eV) are all exhibited.

The intermediates of BPA degradation were identified by UPLC-Q-TOF-MS. As shown in Table S5, there were nine intermediates (formulated from P1 to P9) besides BPA itself. The P1 (m/z 242), P2 (m/z 247), P3 (m/z 135), P4 (m/z 133), and P5 (m/z 94) were identified to be the intermediates that still possess aromatic ring; The P6 (m/z 117), P7 (m/z 115), P8 (m/z 99), and P9 (m/z 89) were identified to be the intermediates that after the ring-opening reactions. These intermediates were generally in agreement with those in previous reports.<sup>8,9</sup>

## References

- [1] L. Lyu, L. Zhang, C. Hu, M. Yang, *J. Mater. Chem. A* 2016, **4**, 8610-8619.
- [2] L. Lyu, L. Zhang, Q. Wang, Y. Nie and C. Hu, *Environ. Sci. Technol.*, 2015, **49**, 8639-8647.
- [3] M. P. Pachamuthu, S. Karthikeyan, R. Maheswari, A. F. Lee and A. Ramanathan, *Appl. Surf. Sci.* 2017, **393**, 67-73.
- [4] F. Parmigiani, G. Pacchioni, F. Illas, P.S. Bagus, *J Electron Spectrosc.* 1992, **592**, 55-269.
- [5] J.R. Lindsay, H.J. Rose, W.E. Swartz, P.H. Watts, K.A. Rayburn, *Appl. Spectrosc.* 1973, **27**, 1-5.
- [6] L. Li, W. Han, F. Dong, L. Zong, Z. Tang and J. Zhang, *Micropor. Mesopor. Mater.*, 2017, **249**, 1-9.

- 1 [7] I. Obregón, I. Gandarias, A. Ocio, I. García-García, N. Alvarez de Eulate and P. L. Arias, *Appl.*  
2 *Catal. B-Environ.*, 2017, **210**, 328-341.
- 3 [8] J. Sharma, I. M. Mishra, D. D. Dionysiou and V. Kumar, *Chem. Eng. J.*, 2015, **276**, 193-204.
- 4 [9] J. Zhang, B. Sun and X. Guan, *Sep. Purif. Technol.*, 2013, **107**, 48-53.
